# Supplementary material for: Tuning the edge states in X-type carbon based molecules for applications in nonlinear optics
Source: Royal Society of Chemistry journal article supplement (doi:10.1039/d1cp00383f), 2021-03-19
Supplement: d1cp00383f1.pdf [file d1cp00383f1.pdf]

## Supporting Information

### Tuning the edge states in X-type carbon based molecules for application in nonlinear optics

Cui-Cui Yang,<sup>a</sup> Xue-Lian Zheng,<sup>a</sup> Wei Quan Tian,<sup>\*a</sup> Wei-Qi Li,<sup>\*bc</sup> Ling Yang<sup>\*d</sup>

<sup>a</sup> Chongqing Key Laboratory of Theoretical and Computational Chemistry, College of Chemistry and Chemical Engineering, Chongqing University, Huxi Campus, Chongqing 401331, P. R. China

<sup>b</sup> Department of Physics, Harbin Institute of Technology, Harbin 150001, P. R. China

<sup>c</sup> Collaborative Innovation Center of Extreme Optics, Shanxi University, Taiyuan 030006, P. R. China

<sup>d</sup> MIT Key Laboratory of Critical Materials Technology for New Energy Conversion and Storage, Institute of Theoretical and Simulational Chemistry, School of Chemistry and Chemical Engineering, Harbin Institute of Technology, Harbin 150001, P. R. China

\*Corresponding author: tianwq@cqu.edu.cn

#### Supporting Information list:

**Figure S1** The electronic spectra of experimentally synthesized molecule DHR with (a) experiment (black line)<sup>1</sup> and the simulated absorptions due to  $S_0-S_1$  (sky-blue line) and  $S_0-S_2$  (green line) transitions<sup>1</sup> and (b) predicted with ZINDO.

**Figure S2** The molecular orbitals associated with the major electron excitations in (a)  $X_4$ -CO, and (b)  $X_4$ -CO-NA.

**Figure S3** Structures of X-armchair graphene nanoribbon with azulenes, aniline, formoxime and tert-butylamine.

**Figure S4** Predicted the static first hyperpolarizabilities  $\langle\beta_0\rangle$  (in  $10^{-30}$  esu) of  $X_1$ -H6,  $X_4$ -CO,  $X_4$ -CO-NA, and  $X_4$ -CO-AN from sum-over-states (SOS) model and coupled perturbed Kohn-Sham model (CPKS) at PBE0/6-31G(d,p).

**Figure S5** Structures and frontier molecular orbitals of pure and substituted azulene. The red numbers are bond length in Angstroms.

**Figure S6.** Electronic spectra of azulene and substituted azulenes predicted by ZINDO method and CAM-B3LYP/6-31G++(d,p).

**Figure S7.** (a) Electronic spectra of azulene predicted by ZINDO method and CAM-B3LYP/6-31G++(d,p); (b) Electronic spectra of azulene and naphthalene measured in gas phase.<sup>S2,S3</sup>

**Table S1** C-N bond distances ( $\text{\AA}$ ) in  $X_4$ -CO-NA (AN), substituted azulene, aniline, formoxime and tert-butylamine.

**Table S2** Major electronic excitations with transition nature in X-type molecules, azulene and substituted azulene

**Table S3** Predicted major  $\beta_{ijk}$  [ $i, j, k \in (x, y, z)$ ] ( $\times 10^{-30}$  esu) of  $X_4$ -CO-NA and  $X_4$ -CO-AN and the related molecular properties with important contributions to the  $\beta_{ijk}$  according to the SOS model.

**Table S4** The electronic properties and static first hyperpolarizability ( $\langle \beta_0 \rangle$ ), the energy gaps ( $E_{\text{gap}}$ ) between the highest occupied molecular orbital ( $E_{\text{HOMO}}$ ) and the lowest unoccupied molecular orbital ( $E_{\text{LUMO}}$ ) and the lowest vibrational frequency (LVF) of are closed-shell singlet predicted with PBE0/6-31G(d,p). The relative electronic energy differences ( $\Delta E_{\text{OS-CS}}$  and  $\Delta E_{\text{T-CS}}$ ) between open-shell singlet (OS) or triplet (T) and closed-shell singlet (CS) (CS is taken as the reference), and spin contamination of open-shell singlet ( $\langle S^2 \rangle$ ) predicted at UPBE0/6-31G(d,p) level.

**Table S5** Predicted major  $\beta_{ijk}$  [ $i, j, k \in (x, y, z)$ ] ( $\times 10^{-30}$  esu) of azulene and  $\text{NO}_2$  substituted azulene and the related molecular properties with important contributions to the  $\beta_{ijk}$  according to the SOS model.

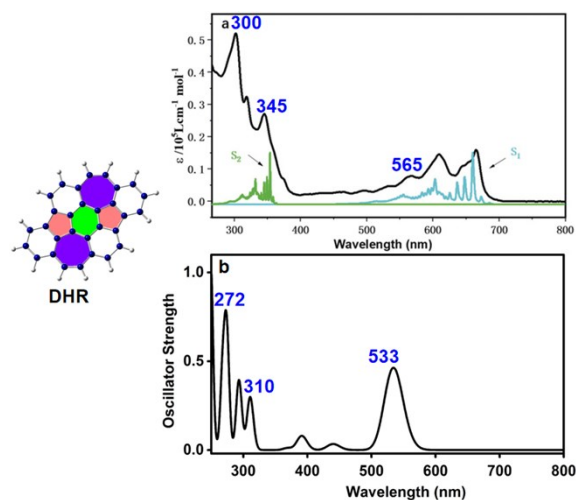

**Figure S1** The electronic spectra of experimentally synthesized molecule DHR with (a) experiment (black line)<sup>S1</sup> and the simulated absorptions due to  $S_0$ - $S_1$  (sky-blue line) and  $S_0$ - $S_2$  (green line) transitions<sup>S1</sup> and (b) predicted with ZINDO.

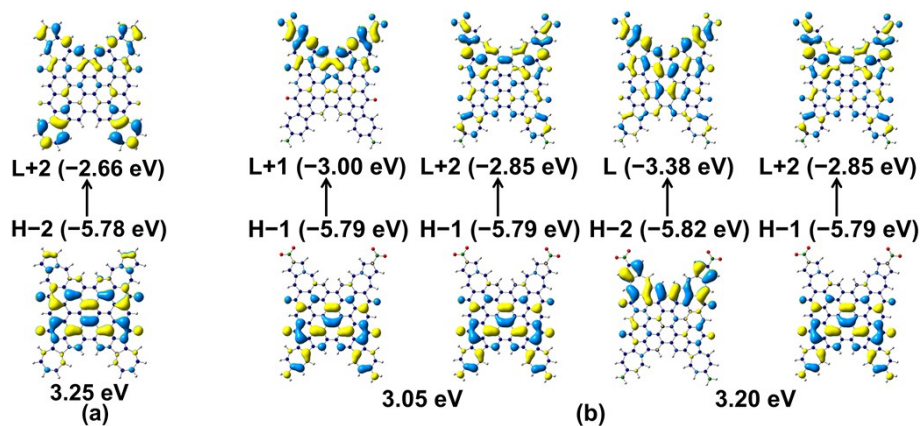

**Figure S2** The molecular orbitals associated with the major electron excitations in (a)  $X_4$ -CO, and (b)  $X_4$ -CO-NA.

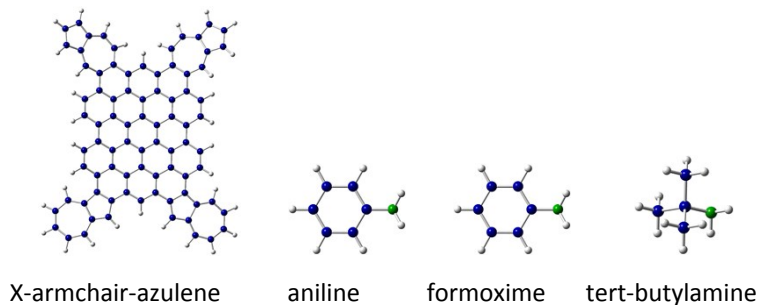

**Figure S3** Structures of X-armchair graphene nanoribbon with azulenes, aniline, formoxime and tert-butylamine.

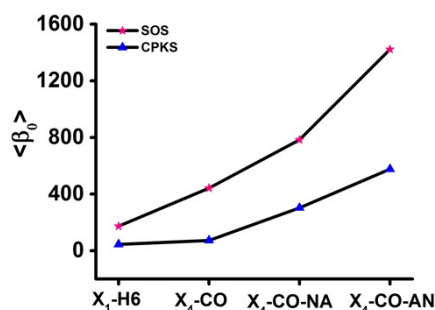

**Figure S4** Predicted the static first hyperpolarizabilities  $\langle \beta_0 \rangle$  (in  $10^{-30}$  esu) of X<sub>1</sub>-H6, X<sub>4</sub>-CO, X<sub>4</sub>-CO-NA, and X<sub>4</sub>-CO-AN from sum-over-states (SOS) model and coupled perturbed Kohn-Sham model (CPKS) at PBE0/6-31G(d,p).

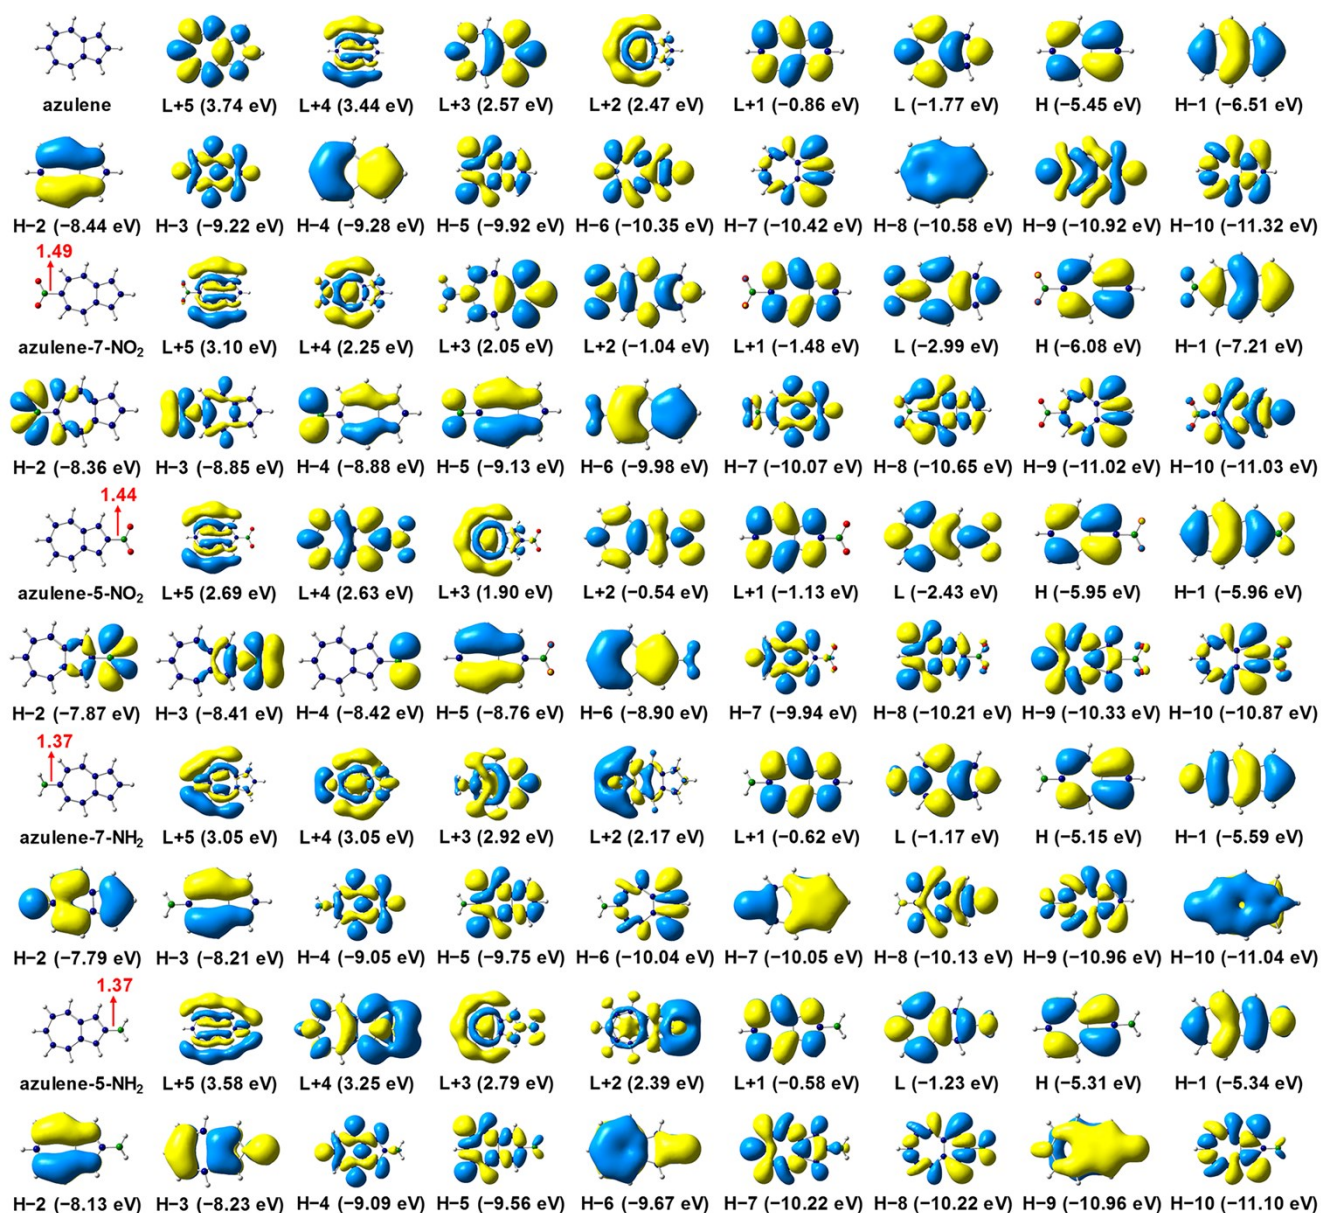

**Figure S5** Structures and frontier molecular orbitals of pure and substituted azulene. The red numbers are bond length in Angstroms.

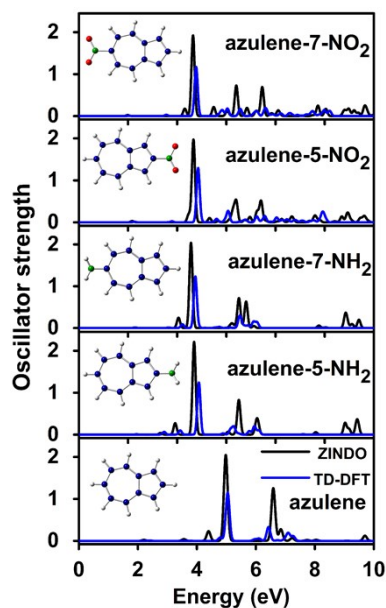

**Figure S6.** Electronic spectra of azulene and substituted azulenes predicted by ZINDO method and CAM-B3LYP/6-31G++(d,p).

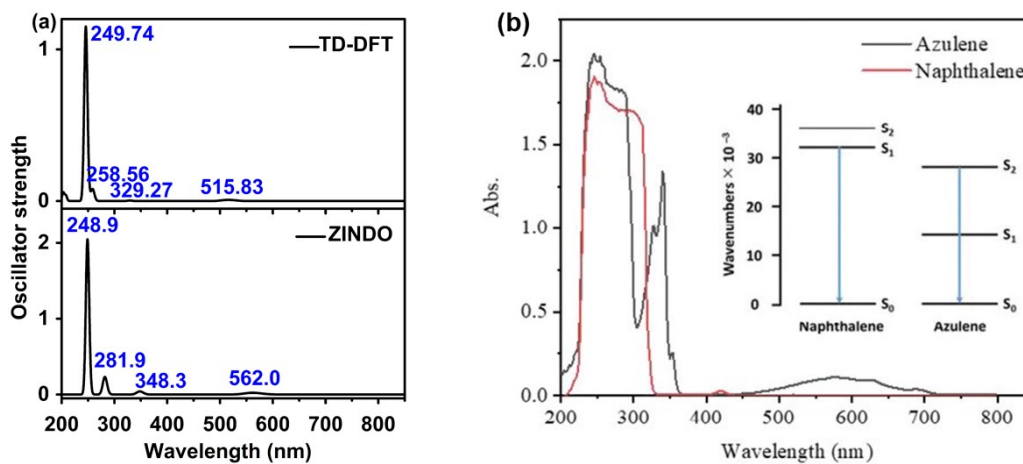

**Figure S7.** (a) Electronic spectra of azulene predicted by ZINDO method and CAM-B3LYP/6-31++G(d,p); (b) Electronic spectra of azulene and naphthalene measured in gas phase.<sup>S2,S3</sup>

**Table S1** C-N bond distances (Å) in X<sub>4</sub>-CO-NA (AN), substituted azulene, aniline, formoxime and tert-butylamine. C<sub>5</sub>-N is bond distance between the carbon atom of pentagon and the nitrogen atom of NH<sub>2</sub> or NO<sub>2</sub>; C<sub>7</sub>-N is bond distance between the carbon atom of heptagon and the nitrogen atom of NH<sub>2</sub> or NO<sub>2</sub>. C-N is carbon-nitrogen bond distance of aniline, formoxime or tert-butylamine.

| Compound                  | C <sub>5</sub> -N | C <sub>7</sub> -N | C-N  |
|---------------------------|-------------------|-------------------|------|
| X <sub>4</sub> -CO-NA     | 1.44              | 1.36              |      |
| X <sub>4</sub> -CO-AN     | 1.36              | 1.49              |      |
| azulene-5-NH <sub>2</sub> | 1.37              |                   |      |
| azulene-5-NO <sub>2</sub> | 1.44              |                   |      |
| azulene-7-NH <sub>2</sub> |                   | 1.37              |      |
| azulene-7-NO <sub>2</sub> |                   | 1.49              |      |
| aniline                   |                   |                   | 1.39 |
| formoxime                 |                   |                   | 1.27 |
| tert-butylamine           |                   |                   | 1.47 |

**Table S2** Major electronic excitations with transition nature in X-type molecules, azulene and substituted azulene ( $f$  is the oscillator strength in arbitrary unit,  $E$  is the transition energy in eV (nm) unit, Contribution value to  $\langle\beta_0\rangle$  in  $10^{-30}$  esu unit).

| Compounds                                                                              | $f$    | $E$                             | Transition                         | Major contributions to $\langle\beta_0\rangle$ | Contribution value to $\langle\beta_0\rangle$ |
|----------------------------------------------------------------------------------------|--------|---------------------------------|------------------------------------|------------------------------------------------|-----------------------------------------------|
| X <sub>1</sub> -H6 (C <sub>78</sub> H <sub>36</sub> )                                  | 0.1866 | 1.76                            | S <sub>0</sub> →S <sub>1</sub>     | H→L (27.48%)                                   | -61.41                                        |
|                                                                                        |        |                                 |                                    | H→L+1 (56.14%)                                 |                                               |
|                                                                                        | 1.2202 | 1.93                            | S <sub>0</sub> →S <sub>2</sub>     | H→L (57.97%)                                   | 121.01                                        |
|                                                                                        |        |                                 |                                    | H→L+1 (20.76%)                                 |                                               |
| 0.2346                                                                                 | 2.34   | S <sub>0</sub> →S <sub>6</sub>  | H→L+2 (56.39%)                     | -111.57                                        |                                               |
| 0.4577                                                                                 | 2.55   | S <sub>0</sub> →S <sub>11</sub> | H→L+6 (37.52%)<br>H-1→L (15.82%)   | -196.72                                        |                                               |
| X <sub>4</sub> -CO (C <sub>78</sub> H <sub>26</sub> O <sub>4</sub> )                   | 0.2418 | 2.08                            | S <sub>0</sub> →S <sub>1</sub>     | H-1→L+3 (11.79%)                               | 62.60                                         |
|                                                                                        |        |                                 |                                    | H→L (44.59%)                                   |                                               |
|                                                                                        |        |                                 |                                    | H→L+3 (11.77%)                                 |                                               |
|                                                                                        | 0.6248 | 2.57                            | S <sub>0</sub> →S <sub>5</sub>     | H-3→L+6 (10.95%)                               | -45.16                                        |
|                                                                                        |        |                                 |                                    | H→L (20.31%)<br>H→L+5 (12.05%)                 |                                               |
|                                                                                        | 0.7172 | 2.90                            | S <sub>0</sub> →S <sub>9</sub>     | H-5→L (23.12%)                                 | 52.66                                         |
| H-3→L+1 (12.32%)<br>H-2→L+4 (16.42%)                                                   |        |                                 |                                    |                                                |                                               |
| 2.5305                                                                                 | 2.92   | S <sub>0</sub> →S <sub>10</sub> | H-2→L (37.14%)                     | 23.44                                          |                                               |
|                                                                                        |        |                                 | H-1→L+1 (10.91%)<br>H→L+4 (12.73%) |                                                |                                               |
| 1.6253                                                                                 | 3.25   | S <sub>0</sub> →S <sub>17</sub> | H-2→L+2 (26.92%)                   | 161.76                                         |                                               |
| X <sub>4</sub> -CO-NA (C <sub>78</sub> H <sub>26</sub> N <sub>4</sub> O <sub>8</sub> ) | 0.4970 | 2.08                            | S <sub>0</sub> →S <sub>1</sub>     | H-2→L (10.37%)                                 | -61.72                                        |
|                                                                                        |        |                                 |                                    | H→L (47.18%)                                   |                                               |
|                                                                                        | 0.7411 | 2.50                            | S <sub>0</sub> →S <sub>6</sub>     | H→L (24.81%)                                   | -139.76                                       |
|                                                                                        |        |                                 |                                    | H→L+6 (23.49%)                                 |                                               |
|                                                                                        | 2.1567 | 2.91                            | S <sub>0</sub> →S <sub>12</sub>    | H-2→L+1 (10.04%)                               | -32.71                                        |
|                                                                                        |        |                                 |                                    | H-1→L (19.08%)                                 |                                               |
|                                                                                        |        |                                 |                                    | H→L+4 (15.53%)                                 |                                               |
|                                                                                        | 1.2614 | 3.05                            | S <sub>0</sub> →S <sub>13</sub>    | H-1→L+2 (35.77%)                               | -205.66                                       |
| H-1→L+1 (10.82%)                                                                       |        |                                 |                                    |                                                |                                               |
| 1.6595                                                                                 | 3.20   | S <sub>0</sub> →S <sub>16</sub> | H-2→L (17.77%)                     | -16.98                                         |                                               |
|                                                                                        |        |                                 | H-1→L+2 (15.70%)                   |                                                |                                               |
| 0.7776                                                                                 | 3.37   | S <sub>0</sub> →S <sub>22</sub> | H→L+3 (25.80%)                     | -143.72                                        |                                               |
|                                                                                        |        |                                 | H-1→L+1 (10.19%)                   |                                                |                                               |
| 0.3560                                                                                 | 4.02   | S <sub>0</sub> →S <sub>46</sub> | H-7→L (11.04%)                     | -39.26                                         |                                               |
|                                                                                        |        |                                 | H-3→L+2 (10.11%)                   |                                                |                                               |
| X <sub>4</sub> -CO-AN (C <sub>78</sub> H <sub>26</sub> N <sub>4</sub> O <sub>8</sub> ) | 0.0248 | 1.92                            | S <sub>0</sub> →S <sub>1</sub>     | H-6→L+1 (10.72%)                               | -17.59                                        |
|                                                                                        |        |                                 |                                    | H-2→L (18.04%)                                 |                                               |
|                                                                                        |        |                                 |                                    | H→L (31.69%)                                   |                                               |
|                                                                                        | 0.4417 | 2.24                            | S <sub>0</sub> →S <sub>3</sub>     | H→L (16.81%)                                   | -46.74                                        |
| H-2→L+2 (25.00%)                                                                       |        |                                 |                                    |                                                |                                               |
| 2.0427                                                                                 | 2.91   | S <sub>0</sub> →S <sub>12</sub> | H-2→L+3 (13.74%)                   | -89.95                                         |                                               |

|                                                                             |        |      |                                 |                                                    |         |
|-----------------------------------------------------------------------------|--------|------|---------------------------------|----------------------------------------------------|---------|
|                                                                             |        |      |                                 | H-1→L (24.81%)<br>H→L+4 (10.01%)                   |         |
|                                                                             | 2.7777 | 3.05 | S <sub>0</sub> →S <sub>13</sub> | H-1→L+1 (27.78%)<br>H-1→L+4 (10.61%)               | -355.73 |
|                                                                             | 0.6405 | 3.11 | S <sub>0</sub> →S <sub>17</sub> | H-2→L+7 (10.60%)<br>H-2→L (14.69%)                 | -111.48 |
|                                                                             | 0.2506 | 3.50 | S <sub>0</sub> →S <sub>30</sub> | H-4→L (11.64%)<br>H-2→L (11.99%)                   | -57.20  |
|                                                                             | 0.2431 | 3.82 | S <sub>0</sub> →S <sub>40</sub> | H-2→L+2 (20.63%)                                   | -55.27  |
|                                                                             | 0.5087 | 3.89 | S <sub>0</sub> →S <sub>42</sub> | H→L+9 (10.17%)                                     | -18.05  |
|                                                                             | 0.4451 | 4.04 | S <sub>0</sub> →S <sub>49</sub> | H→L+7 (11.13%)                                     | -34.96  |
|                                                                             | 0.2919 | 4.28 | S <sub>0</sub> →S <sub>62</sub> | H-3→L+2 (12.47%)                                   | -15.79  |
|                                                                             | 0.0975 | 4.29 | S <sub>0</sub> →S <sub>63</sub> | H-10→L (10.73%)                                    | -11.56  |
|                                                                             | 0.1636 | 4.33 | S <sub>0</sub> →S <sub>67</sub> | H-3→L+1 (24.21%)                                   | -26.56  |
|                                                                             | 0.6577 | 4.48 | S <sub>0</sub> →S <sub>76</sub> | H-4→L+2 (11.98%)                                   | -113.70 |
|                                                                             | 0.2412 | 4.58 | S <sub>0</sub> →S <sub>83</sub> | H-5→L+3 (13.45%)                                   | -15.78  |
| azulene (C <sub>10</sub> H <sub>8</sub> )                                   | 2.0474 | 4.98 | S <sub>0</sub> →S <sub>4</sub>  | H-1→L (63.28%)<br>H→L+1 (34.05%)                   | 52.86   |
|                                                                             | 0.0316 | 2.17 | S <sub>0</sub> →S <sub>1</sub>  | H→L (90.54%)                                       | 3.63    |
|                                                                             | 0.1904 | 4.47 | S <sub>0</sub> →S <sub>6</sub>  | H-1→L (74.15%)                                     | 1.17    |
|                                                                             | 1.9718 | 4.66 | S <sub>0</sub> →S <sub>7</sub>  | H-1→L (39.83%)<br>H→L+1 (35.87%)                   | -1.86   |
|                                                                             | 0.1025 | 5.32 | S <sub>0</sub> →S <sub>8</sub>  | H-1→L+2 (84.14%)                                   | -2.64   |
| azulene-5-NO <sub>2</sub> (C <sub>10</sub> H <sub>7</sub> NO <sub>2</sub> ) | 0.2571 | 6.28 | S <sub>0</sub> →S <sub>17</sub> | H-5→L (33.28%)<br>H-4→L (22.94%)<br>H→L+3 (28.81%) | 1.61    |
|                                                                             | 0.4897 | 6.40 | S <sub>0</sub> →S <sub>18</sub> | H-4→L (50.98%)<br>H→L+4 (74.29%)                   | 2.42    |
|                                                                             | 0.4872 | 7.42 | S <sub>0</sub> →S <sub>33</sub> | H-4→L+2 (78.21%)<br>H-1→L+7 (12.07%)               | 1.18    |
|                                                                             | 0.1096 | 9.58 | S <sub>0</sub> →S <sub>59</sub> | H-2→L+6 (90.03%)                                   | 1.33    |
| azulene-5-NH <sub>2</sub> (C <sub>10</sub> H <sub>9</sub> N)                | 2.2084 | 4.69 | S <sub>0</sub> →S <sub>4</sub>  | H-1→L (39.83%)<br>H→L+1 (57.81%)                   | 19.06   |
| azulene-7-NO <sub>2</sub> (C <sub>10</sub> H <sub>7</sub> NO <sub>2</sub> ) | 1.9229 | 4.65 | S <sub>0</sub> →S <sub>7</sub>  | H-1→L (51.32%)<br>H→L+1 (38.95%)                   | -106.69 |
| azulene-7-NH <sub>2</sub> (C <sub>10</sub> H <sub>9</sub> N)                | 2.0388 | 4.56 | S <sub>0</sub> →S <sub>4</sub>  | H-1→L (49.35%)<br>H→L+1 (43.30%)                   | 42.02   |



**Table S3** Predicted major  $\beta_{ijk}$  [ $i, j, k \in (x, y, z)$ ] ( $\times 10^{-30}$  esu) of  $X_4$ -CO-NA and  $X_4$ -CO-AN and the related molecular properties with important contributions to the  $\beta_{ijk}$  according to the SOS model. [ $m=0$  is the ground state;  $m>0$  is the  $m$ th excited state].

| Structures<br>( $\langle \beta_0 \rangle$ ) | $\beta_{zzz}$ | $\beta_{xxx}$ | $\beta_{yyx}$                     | State<br>[ $S_m(m>0)$ ]           | Excitation<br>energy | State dipole moment |      |       |       | Transition dipole moment |       |       |       |
|---------------------------------------------|---------------|---------------|-----------------------------------|-----------------------------------|----------------------|---------------------|------|-------|-------|--------------------------|-------|-------|-------|
|                                             |               |               |                                   |                                   |                      | X                   | Y    | Z     | tot   | X                        | Y     | Z     | tot   |
| $X_4$ -CO-NA<br>(-783.23)                   |               |               |                                   | $S_0$                             |                      | 0.00                | 0.00 | 30.16 | 30.16 |                          |       |       |       |
|                                             | -61.72        | 0.00          | 0.00                              | $S_1 [S_0 \rightarrow S_1]$       | 2.08                 | 0.00                | 0.00 | 31.98 | 31.98 | 0.00                     | 0.00  | -7.93 | 7.93  |
|                                             | -139.76       | 0.00          | 0.00                              | $S_6 [S_0 \rightarrow S_6]$       | 2.50                 | 0.00                | 0.00 | 34.96 | 34.96 | 0.00                     | 0.00  | -8.83 | 8.83  |
|                                             | -205.66       | 0.00          | 0.00                              | $S_{13} [S_0 \rightarrow S_{13}]$ | 3.05                 | 0.00                | 0.00 | 37.70 | 37.70 | 0.00                     | 0.00  | 10.43 | 10.43 |
|                                             | -143.72       | 0.00          | 0.00                              | $S_{22} [S_0 \rightarrow S_{22}]$ | 3.37                 | 0.00                | 0.00 | 41.67 | 41.67 | 0.00                     | 0.00  | 7.79  | 7.79  |
|                                             | -39.26        | 0.00          | 0.00                              | $S_{46} [S_0 \rightarrow S_{46}]$ | 4.02                 | 0.00                | 0.00 | 41.82 | 41.82 | 0.00                     | 0.00  | 4.83  | 4.83  |
| $X_4$ -CO-AN<br>(-1421.98)                  |               |               |                                   | $S_0$                             |                      | 6.59                | 0.00 | 0.00  | 6.59  |                          |       |       |       |
|                                             | 0.00          | 0.00          | -89.95                            | $S_{12} [S_0 \rightarrow S_{12}]$ | 2.91                 | 11.87               | 0.00 | 0.00  | 11.87 | 0.00                     | 13.60 | 0.15  | 13.62 |
|                                             | 0.00          | -355.73       | 0.00                              | $S_{13} [S_0 \rightarrow S_{13}]$ | 3.05                 | 12.52               | 0.00 | 0.01  | 12.52 | -15.48                   | 0.00  | 0.00  | 15.48 |
|                                             | 0.00          | -111.48       | 0.00                              | $S_{17} [S_0 \rightarrow S_{17}]$ | 3.11                 | 15.56               | 0.00 | 0.06  | 15.56 | 7.16                     | 0.00  | 0.00  | 7.16  |
|                                             | 0.00          | -54.08        | 0.00                              | $S_{30} [S_0 \rightarrow S_{30}]$ | 3.50                 | 22.48               | 0.00 | 0.01  | 22.48 | 4.34                     | 0.00  | 0.00  | 4.34  |
|                                             | -0.56         | -55.27        | 0.00                              | $S_{40} [S_0 \rightarrow S_{40}]$ | 3.82                 | 27.19               | 0.00 | 0.01  | 27.19 | -4.09                    | 0.00  | 0.00  | 4.09  |
|                                             | -0.10         | 0.00          | -18.04                            | $S_{42} [S_0 \rightarrow S_{42}]$ | 3.89                 | 16.80               | 0.00 | 0.01  | 16.80 | 0.00                     | 5.86  | 0.13  | 5.88  |
|                                             | 0.00          | -34.96        | 0.00                              | $S_{49} [S_0 \rightarrow S_{49}]$ | 4.04                 | 15.02               | 0.00 | 0.01  | 15.02 | 5.39                     | 0.00  | 0.00  | 5.39  |
|                                             | 0.00          | 0.00          | -15.77                            | $S_{62} [S_0 \rightarrow S_{62}]$ | 4.28                 | 27.21               | 0.00 | 0.01  | 27.21 | 0.00                     | 4.24  | -0.17 | 4.27  |
|                                             | 0.00          | -11.56        | 0.00                              | $S_{63} [S_0 \rightarrow S_{63}]$ | 4.29                 | 21.79               | 0.00 | 0.01  | 21.79 | -2.45                    | 0.00  | 0.00  | 2.45  |
|                                             | 0.00          | -26.56        | 0.00                              | $S_{67} [S_0 \rightarrow S_{67}]$ | 4.33                 | 28.07               | 0.00 | 0.00  | 28.07 | -3.15                    | 0.00  | 0.00  | 3.15  |
| 0.00                                        | -113.70       | 0.00          | $S_{76} [S_0 \rightarrow S_{76}]$ | 4.48                              | 31.92                | 0.00                | 0.01 | 31.92 | -6.21 | 0.00                     | 0.00  | 6.21  |       |
| 0.00                                        | -15.78        | 0.00          | $S_{83} [S_0 \rightarrow S_{83}]$ | 4.58                              | 16.83                | 0.00                | 0.01 | 16.83 | -3.72 | 0.00                     | 0.00  | 3.72  |       |

(1)  $X_4$ -CO-NA:

$$\beta_{zzz}[S_0 \rightarrow S_1] = 6 \times \frac{-7.93 \times (31.98 - 30.16) \times 7.93}{2.08^2} \times \frac{(10^{-18})^3}{(1.602 \times 10^{-12})^2} \text{ esu} = -61.84 \times 10^{-30} \text{ esu}$$

$$\beta_{zzz}[S_0 \rightarrow S_6] = 6 \times \frac{-8.83 \times (34.96 - 30.16) \times 8.83}{2.50^2} \times \frac{(10^{-18})^3}{(1.602 \times 10^{-12})^2} \text{ esu} = -139.99 \times 10^{-30} \text{ esu}$$

$$\beta_{zzz}[S_0 \rightarrow S_{13}] = 6 \times \frac{10.43 \times (37.70 - 30.16) \times (-10.43)}{3.05^2} \times \frac{(10^{-18})^3}{(1.602 \times 10^{-12})^2} \text{ esu} = -206.14 \times 10^{-30} \text{ esu}$$

$$\beta_{zzz}[S_0 \rightarrow S_{22}] = 6 \times \frac{7.79 \times (41.67 - 30.16) \times (-7.79)}{3.37^2} \times \frac{(10^{-18})^3}{(1.602 \times 10^{-12})^2} \text{ esu} = -143.79 \times 10^{-30} \text{ esu}$$

$$\beta_{zzz}[S_0 \rightarrow S_{46}] = 6 \times \frac{4.83 \times (41.82 - 30.16) \times (-4.83)}{4.02^2} \times \frac{(10^{-18})^3}{(1.602 \times 10^{-12})^2} \text{ esu} = -39.35 \times 10^{-30} \text{ esu}$$

(2) X<sub>4</sub>-CO-AN:

$$\beta_{YXX}[S_0 \rightarrow S_{12}] = [2 \times \frac{13.60 \times (11.87 - 6.59) \times (-13.60)}{2.91^2} + 4 \times \frac{13.60 \times (0.00 - 0.00) \times (-13.60)}{2.91^2}] \times \frac{(10^{-18})^3}{(1.602 \times 10^{-12})^2} esu$$
$$= -89.87 \times 10^{-30} esu$$

$$\beta_{XXX}[S_0 \rightarrow S_{13}] = 6 \times \frac{(-15.48) \times (12.52 - 6.59) \times 15.48}{3.05^2} \times \frac{(10^{-18})^3}{(1.602 \times 10^{-12})^2} esu = 357.13 \times 10^{-30} esu$$

$$\beta_{XXX}[S_0 \rightarrow S_{17}] = 6 \times \frac{7.16 \times (15.56 - 6.59) \times (-7.16)}{3.11^2} \times \frac{(10^{-18})^3}{(1.602 \times 10^{-12})^2} esu = -111.15 \times 10^{-30} esu$$

$$\beta_{XXX}[S_0 \rightarrow S_{30}] = 6 \times \frac{4.34 \times (22.48 - 6.59) \times (-4.34)}{3.50^2} \times \frac{(10^{-18})^3}{(1.602 \times 10^{-12})^2} esu = -57.12 \times 10^{-30} esu$$

$$\beta_{XXX}[S_0 \rightarrow S_{40}] = 6 \times \frac{(-4.09) \times (27.19 - 6.59) \times 4.09}{3.82^2} \times \frac{(10^{-18})^3}{(1.602 \times 10^{-12})^2} esu = -55.21 \times 10^{-30} esu$$

$$\beta_{YXX}[S_0 \rightarrow S_{42}] = [2 \times \frac{5.86 \times (16.80 - 6.59) \times (-5.86)}{3.89^2} + 4 \times \frac{5.86 \times (0.00 - 0.00) \times (-5.86)}{3.89^2}] \times \frac{(10^{-18})^3}{(1.602 \times 10^{-12})^2} esu$$
$$= -18.06 \times 10^{-30} esu$$

$$\beta_{XXX}[S_0 \rightarrow S_{49}] = 6 \times \frac{5.39 \times (15.02 - 6.59) \times (-5.39)}{4.04^2} \times \frac{(10^{-18})^3}{(1.602 \times 10^{-12})^2} esu = -35.08 \times 10^{-30} esu$$

$$\beta_{YXX}[S_0 \rightarrow S_{62}] = [2 \times \frac{4.24 \times (27.21 - 6.59) \times (-4.24)}{4.28^2} + 4 \times \frac{0.00 \times (0.00 - 0.00) \times 0.00}{4.28^2}] \times \frac{(10^{-18})^3}{(1.602 \times 10^{-12})^2} esu$$
$$= -15.77 \times 10^{-30} esu$$

$$\beta_{XXX}[S_0 \rightarrow S_{63}] = 6 \times \frac{-2.45 \times (21.79 - 6.59) \times 2.45}{4.29^2} \times \frac{(10^{-18})^3}{(1.602 \times 10^{-12})^2} esu = -11.59 \times 10^{-30} esu$$

$$\beta_{XXX}[S_0 \rightarrow S_{67}] = 6 \times \frac{-3.15 \times (28.07 - 6.59) \times 3.15}{4.33^2} \times \frac{(10^{-18})^3}{(1.602 \times 10^{-12})^2} esu = -26.58 \times 10^{-30} esu$$

$$\beta_{XXX}[S_0 \rightarrow S_{76}] = 6 \times \frac{-6.21 \times (31.92 - 6.59) \times 6.21}{4.48^2} \times \frac{(10^{-18})^3}{(1.602 \times 10^{-12})^2} esu = -113.79 \times 10^{-30} esu$$

$$\beta_{XXX}[S_0 \rightarrow S_{67}] = 6 \times \frac{-3.72 \times (16.83 - 6.59) \times 3.72}{4.58^2} \times \frac{(10^{-18})^3}{(1.602 \times 10^{-12})^2} esu = -15.79 \times 10^{-30} esu$$

**Table S4** The electronic properties and static first hyperpolarizability ( $\langle\beta_0\rangle$ ), the energy gaps ( $E_{\text{gap}}$ ) between the highest occupied molecular orbital ( $E_{\text{HOMO}}$ ) and the lowest unoccupied molecular orbital ( $E_{\text{LUMO}}$ ) and the lowest vibrational frequency (LVF) of are closed-shell singlet predicted with PBE0/6-31G(d,p). The relative electronic energy differences ( $\Delta E_{\text{OS-CS}}$  and  $\Delta E_{\text{T-CS}}$ ) between open-shell singlet (OS) or triplet (T) and closed-shell singlet (CS) (CS is taken as the reference), and spin contamination of open-shell singlet ( $\langle S^2 \rangle$ ) predicted at UPBE0/6-31G(d,p) level.

| Compound                                                                    | $\Delta E_{\text{OS-CS}}$<br>(kcal/mol) | $\Delta E_{\text{T-CS}}$<br>(kcal/mol) | $\langle S^2 \rangle$ | LVF<br>/cm <sup>-1</sup> | $E_{\text{HOMO}}$ /eV | $E_{\text{LUMO}}$ /eV | $E_{\text{gap}}$ /eV | $\beta_0$ ( $\beta_0/N$ )<br>( $\times 10^{-30}$ esu) |
|-----------------------------------------------------------------------------|-----------------------------------------|----------------------------------------|-----------------------|--------------------------|-----------------------|-----------------------|----------------------|-------------------------------------------------------|
| DHR (C <sub>30</sub> H <sub>14</sub> )                                      | -0.03                                   | 24.12                                  | 0.00                  | 49.94                    | -4.95                 | -2.43                 | 2.52                 | *                                                     |
| X-armchair-azulene (C <sub>82</sub> H <sub>34</sub> )                       | 0.00                                    | 30.25                                  | 0.00                  | 7.04                     | -4.85                 | -2.36                 | 2.49                 | -45.62<br>(-0.56)                                     |
| azulene (C <sub>10</sub> H <sub>8</sub> )                                   | 0.00                                    | 35.74                                  | 0.00                  | 163.33                   | -5.44                 | -1.77                 | 3.67                 | 59.29<br>(5.93)                                       |
| azulene-5-NO <sub>2</sub> (C <sub>10</sub> H <sub>7</sub> NO <sub>2</sub> ) | 0.00                                    | 33.74                                  | 0.00                  | 60.82                    | -6.19                 | -2.84                 | 3.35                 | 8.40<br>(0.65)                                        |
| azulene-5-NH <sub>2</sub> (C <sub>10</sub> H <sub>9</sub> N)                | 0.00                                    | 41.25                                  | 0.00                  | 117.00                   | -5.31                 | -1.23                 | 4.08                 | 22.34<br>(2.03)                                       |
| azulene-7-NO <sub>2</sub> (C <sub>10</sub> H <sub>7</sub> NO <sub>2</sub> ) | 0.00                                    | 27.61                                  | 0.00                  | 29.70                    | -6.08                 | -2.99                 | 3.09                 | -118.08<br>(-9.08)                                    |
| azulene-7-NH <sub>2</sub> (C <sub>10</sub> H <sub>9</sub> N)                | 0.00                                    | 42.56                                  | 0.00                  | 106.93                   | -5.15                 | -1.17                 | 3.98                 | 41.31<br>(3.76)                                       |

N is the number of heavy atoms. \*: The  $\langle\beta_0\rangle$  of this molecule is not discussed in this work.

**Table S5** Predicted major  $\beta_{ijk}$  [ $i, j, k \in (x, y, z)$ ] ( $\times 10^{-30}$  esu) of azulene and NO<sub>2</sub> substituted azulene and the related molecular properties with important contributions to the  $\beta_{ijk}$  according to the SOS model. [ $m=0$  is the ground state;  $m>0$  is the  $m$ th excited state].

| Structures<br>( $\langle \beta_0 \rangle$ ) | $\beta_{zzz}$ | $\beta_{yyz}$ | $\beta_{yyz}$ | State<br>[ $S_m(m \geq 0)$ ]      | Excitation<br>energy | State dipole moment |      |        |       | Transition dipole moment |      |        |       |
|---------------------------------------------|---------------|---------------|---------------|-----------------------------------|----------------------|---------------------|------|--------|-------|--------------------------|------|--------|-------|
|                                             |               |               |               |                                   |                      | X                   | Y    | Z      | tot   | X                        | Y    | Z      | tot   |
| azulene                                     |               |               |               | $S_0$                             |                      | 0.00                | 0.00 | -2.09  | 2.09  |                          |      |        |       |
|                                             | -52.86        | 0.00          | 0.00          | $S_4 [S_0 \rightarrow S_4]$       | 4.98                 | 0.00                | 0.00 | 3.10   | 3.10  | 0.00                     | 0.00 | -10.40 | 10.40 |
| azulene-5-NO <sub>2</sub>                   |               |               |               | $S_0$                             |                      | 0.00                | 0.00 | -8.72  | 8.72  |                          |      |        |       |
|                                             | 0.00          | 0.00          | -4.65         | $S_1 [S_0 \rightarrow S_1]$       | 2.17                 | 0.00                | 0.00 | -4.76  | 4.76  | 0.00                     | 1.96 | 0.00   | 1.96  |
|                                             | 1.87          | 0.00          | 0.00          | $S_7 [S_0 \rightarrow S_7]$       | 4.66                 | 0.00                | 0.00 | -8.87  | 8.87  | 0.00                     | 0.00 | -10.55 | 10.55 |
|                                             | 2.64          | 0.00          | 0.00          | $S_8 [S_0 \rightarrow S_8]$       | 5.32                 | 0.00                | 0.00 | -14.69 | 14.69 | 0.00                     | 0.00 | -2.25  | 2.25  |
|                                             | 0.00          | 0.00          | -2.51         | $S_{18} [S_0 \rightarrow S_{18}]$ | 6.40                 | 0.00                | 0.00 | -2.62  | 2.62  | 0.00                     | 4.49 | 0.00   | 4.49  |
| azulene-7-NO <sub>2</sub>                   |               |               |               | $S_0$                             |                      | 0.00                | 0.00 | -4.15  | 4.15  |                          |      |        |       |
|                                             | 106.68        | 0.00          | 0.00          | $S_7 [S_0 \rightarrow S_7]$       | 4.65                 | 0.00                | 0.00 | -12.55 | 12.55 | 0.00                     | 0.00 | -10.44 | 10.44 |

(1) azulene:

$$\beta_{zzz}[S_0 \rightarrow S_4] = 6 \times \frac{-10.40 \times [3.10 - (-2.09)] \times 10.40}{4.98^2} \times \frac{(10^{-18})^3}{(1.602 \times 10^{-12})^2} \text{ esu} = -52.92 \times 10^{-30} \text{ esu}$$

(2) azulene-5-NO<sub>2</sub>:

$$\beta_{yyz}[S_0 \rightarrow S_1] = \left[ 2 \times \frac{1.96 \times (0.00 - 0.00) \times (-1.96)}{2.17^2} + 4 \times \frac{1.96 \times [-4.76 - (-8.72)] \times (-1.96)}{2.17^2} \right] \times \frac{(10^{-18})^3}{(1.602 \times 10^{-12})^2} \text{ esu}$$

$$= -5.04 \times 10^{-30} \text{ esu}$$

$$\beta_{zzz}[S_0 \rightarrow S_7] = 6 \times \frac{(-10.55) \times [-8.87 - (-8.72)] \times 10.55}{4.66^2} \times \frac{(10^{-18})^3}{(1.602 \times 10^{-12})^2} \text{ esu} = 1.78 \times 10^{-30} \text{ esu}$$

$$\beta_{zzz}[S_0 \rightarrow S_8] = 6 \times \frac{(-2.25) \times [-14.69 - (-8.72)] \times 2.25}{5.32^2} \times \frac{(10^{-18})^3}{(1.602 \times 10^{-12})^2} \text{ esu} = 2.50 \times 10^{-30} \text{ esu}$$

$$\beta_{yyz}[S_0 \rightarrow S_{18}] = \left[ 2 \times \frac{4.49 \times [-2.62 - (-8.72)] \times (-4.49)}{6.40^2} + 4 \times \frac{4.49 \times (0.00 - 0.00) \times (-4.49)}{6.40^2} \right] \times \frac{(10^{-18})^3}{(1.602 \times 10^{-12})^2} \text{ esu}$$

$$= -2.34 \times 10^{-30} \text{ esu}$$

(3) azulene-7-NO<sub>2</sub>:

$$\beta_{zzz}[S_0 \rightarrow S_7] = 6 \times \frac{-11.25 \times [-12.55 - (-4.15)] \times 11.25}{4.65^2} \times \frac{(10^{-18})^3}{(1.602 \times 10^{-12})^2} \text{ esu} = 114.95 \times 10^{-30} \text{ esu}$$

## Reference:

- S1. X. S. Zhang, Y. Y. Huang, J. Zhang, W. Meng, Q. Peng, R. R. Kong, Z. W. Xiao, J. Liu, M. F. Huang, Y. P. Yi, L. L. Chen, Q. R. Fan, G. B. Lin, Z. T. Liu, G. X. Zhang, L. Jiang and D. Q. Zhang, *Angew. Chem., Int. Ed.*, 2020, **59**, 3529-3533.
- S2. J. Huang, S. Huang, Y. Zhao, B. Feng, K. Jiang, S. Sun, C. Ke, E. Kymakis and X. Zhuang, *Small Methods*, 2020, **4**, 2000628.
- S3. D. Schwarzer, P. Kutne, C. Schröder and J. Troe, *J. Chem. Phys.*, 2004, **121**, 1754-1764.
